# Supplementary material for: Sprouting and Hydrolysis as Biotechnological Tools for Development of Nutraceutical Ingredients from Oat Grain and Hull
Source: MDPI journal article supplement (doi:10.3390/foods11182769), 2022-09-08
Supplement: s1 [file s1]

## Supplementary Materials:

**Table S1.** m/z values of phenolic compounds obtained in oat samples by HPLC-ESI-QTOF-MS. Abbreviations: OG: oat grain, OH: oat hulls, SO: sprouted oat, EH1-OH: enzymatic hydrolysate oat hulls with UltraFloXL, EH2-OH: enzymatic hydrolysate oat hulls with Viscoferm, n.d.: not detected.

| Compound                                  | OG       |          | OH       |          | SO       |          | EH1-OH   |          | EH2-OH   |          |
|-------------------------------------------|----------|----------|----------|----------|----------|----------|----------|----------|----------|----------|
|                                           | m/z exp  | m/z calc |
| Protocatechuic acid                       |          | 153.0193 | n.d.     | n.d.     | 153.0188 | 153.0193 | n.d.     | n.d.     | n.d.     | n.d.     |
| Hydroxybenzoic acid                       | 137.0249 | 137.0244 | 137.0247 | 137.0244 | 137.0238 | 137.0244 | n.d.     | n.d.     | 137.0239 | 137.0244 |
| Ferulic acid                              | 193.051  | 193.0506 | 193.0394 | 193.0506 | 193.0506 | 193.0506 | 193.0502 | 193.0506 | 193.0504 | 193.0506 |
| p-Coumaric acid                           | n.d.     | n.d.     | 163.0405 | 163.0401 | n.d.     | n.d.     | 163.0398 | 163.0401 | 163.0404 | 163.0401 |
| Sinapic acid                              | 223.0617 | 223.0612 | n.d.     | n.d.     | 223.0614 | 223.0612 | n.d.     | n.d.     | n.d.     | n.d.     |
| AvenantrahamideC                          | n.d.     | n.d.     | 314.0671 | 314.0670 | 314.0667 | 314.0670 | n.d.     | n.d.     | n.d.     | n.d.     |
| Avenanthramide2p                          | n.d.     | n.d.     | 298.0733 | 298.0721 | 298.0694 | 298.0721 | n.d.     | n.d.     | n.d.     | n.d.     |
| Avenanthramide2f                          | 328.0834 | 328.0827 | 328.0835 | 328.0827 | 328.0822 | 328.0827 | n.d.     | n.d.     | n.d.     | n.d.     |
| Diferulic isomer 1                        | 385.0935 | 385.0929 | n.d.     | n.d.     | 385.0922 | 385.0929 | n.d.     | n.d.     | n.d.     | n.d.     |
| Diferulic isomer 2                        | 385.0943 | 385.0929 | n.d.     | n.d.     | 385.0935 | 385.0929 | n.d.     | n.d.     | n.d.     | n.d.     |
| Diferulic isomer 4                        | 385.0942 | 385.0929 | n.d.     | n.d.     | 385.0938 | 385.0929 | n.d.     | n.d.     | n.d.     | n.d.     |
| Diferulic isomer 5                        | 385.0947 | 385.0929 | n.d.     | n.d.     | 385.0931 | 385.0929 | n.d.     | n.d.     | n.d.     | n.d.     |
| Diferulic isomer 6                        | 385.0931 | 385.0929 | n.d.     |
| Caffeic acid                              | 179.0359 | 179.0350 | 179.0336 | 179.0350 | 179.0353 | 179.0350 | 179.0354 | 179.0350 | 179.0359 | 179.0350 |
| Isoferulic acid                           | 193.0509 | 193.0506 | n.d.     | n.d.     | 193.0507 | 193.0506 | n.d.     | n.d.     | n.d.     | n.d.     |
| 1-O-Sinapoyl-beta-D-glucose               | 385.1144 | 385.1140 | n.d.     | n.d.     | 385.1142 | 385.114  | n.d.     | n.d.     | n.d.     | n.d.     |
| Apigenin-6-C-arabinoside-8-C-hexoside III | n.d.     | n.d.     | 563.1413 | 563.1406 | 563.1406 | 563.1406 | n.d.     | n.d.     | n.d.     | n.d.     |
| 4-Hydroxybenzaldehyde                     | 121.0294 | 121.0295 | 121.0299 | 121.0295 | 121.0294 | 121.0295 | 121.0293 | 121.0295 | 121.0306 | 121.0295 |

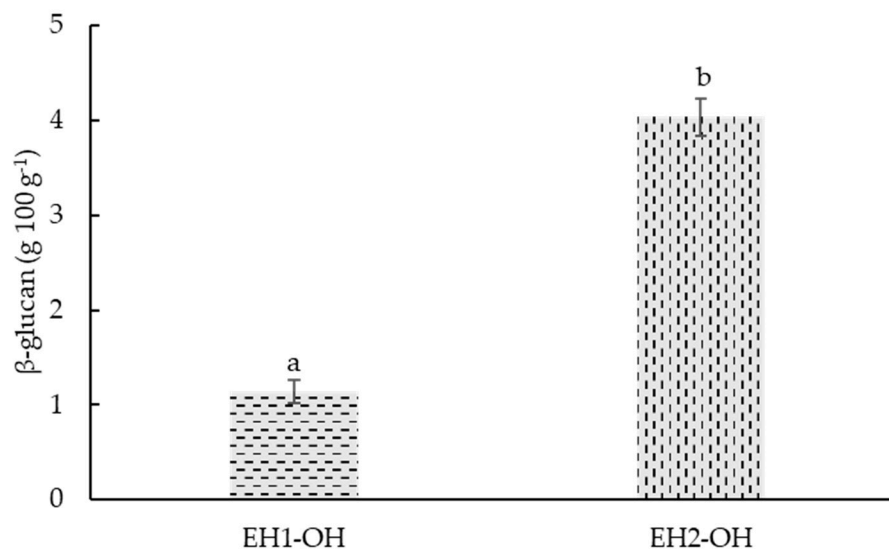

**Figure S1.**  $\beta$ -glucan values of enzymatic hydrolysate oat hull with UltraFloXL (EH1-OH) and enzymatic hydrolysate oat hull with Viscoferm (EH2-OH) samples. Different letters indicate significant differences ( $p < 0.05$ ).

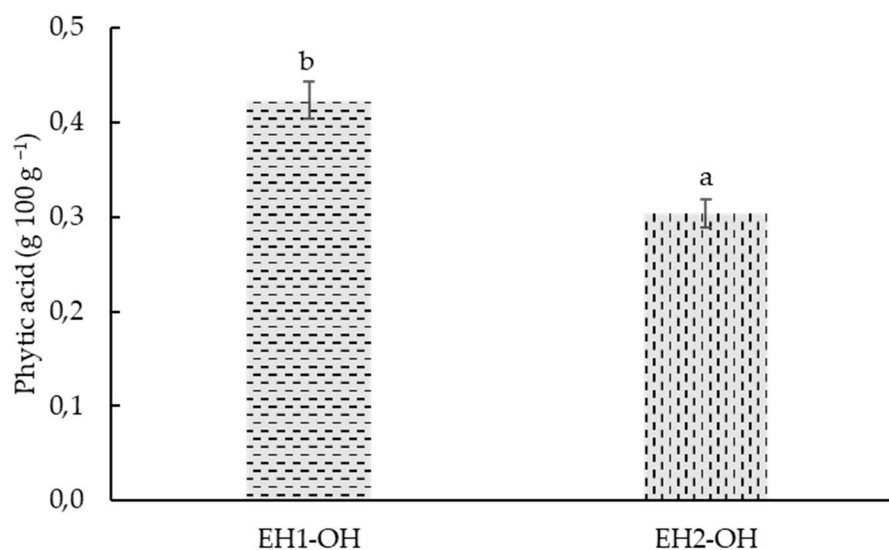

**Figure S2.** Phytic acid values of enzymatic hydrolysate oat hull with UltraFloXL (EH1-OH) and enzymatic hydrolysate oat hull with Viscoferm (EH2-OH) samples. Different letters indicate significant differences ( $p < 0.05$ ).
